# Supplementary material
Source: PubMed Central journal article supplement (PMC7804915)
Supplement: jama-e2023718-s001.pdf [file jama-e2023718-s001.pdf]

## Supplemental Online Content

Insogna IG, Lanes A, Lee MS, Ginsburg ES, Fox JH. Association of fresh embryo transfers compared with cryopreserved-thawed embryo transfers with live birth rate among women undergoing assisted reproduction using freshly retrieved donor oocytes. *JAMA*. Published January 12, 2021.  
doi:10.1001/jama.2020.23718

**eFigure 1.** Progression From Fresh Donor Oocyte Retrieval to Fresh or Cryopreserved-Thawed Embryo Transfer

**eFigure 2.** Live Birth Rates by Year: Embryo Transfer Cycles Using Freshly Retrieved Donor Oocytes

This supplemental material has been provided by the authors to give readers additional information about their work.

**eFigure 1.** Progression From Fresh Donor Oocyte Retrieval to Fresh or Cryopreserved-Thawed Embryo Transfer

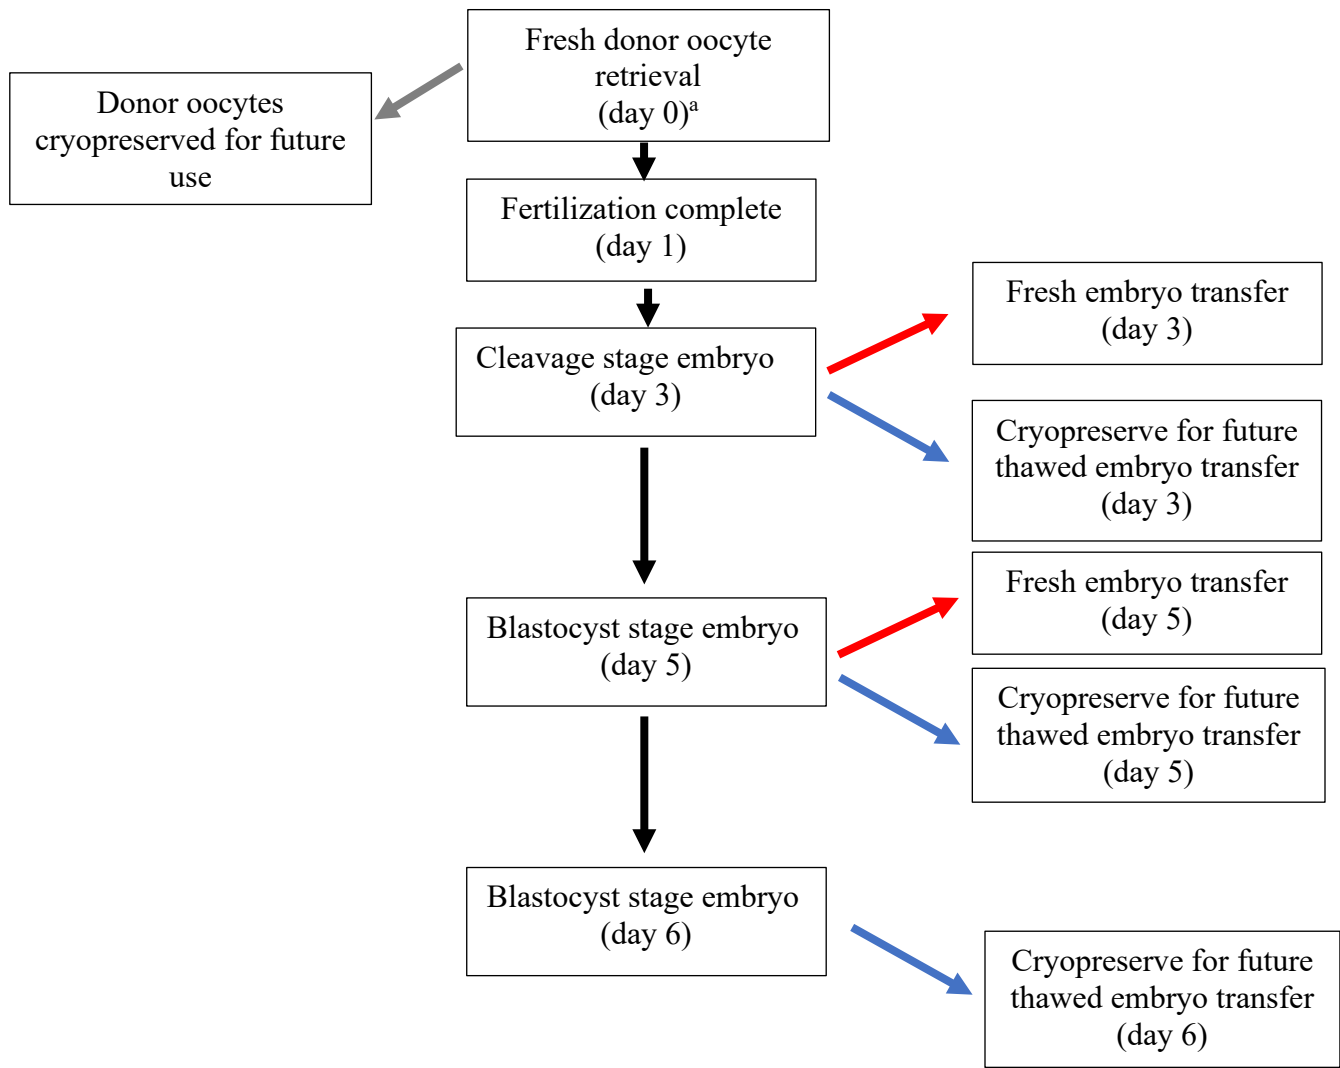

<sup>a</sup> After retrieval, donor oocytes can be cryopreserved for future use (cryopreserved oocytes were excluded from this study), or can be fertilized as fresh oocytes to create embryos that can be either transferred on day 3 or day 5, or cryopreserved for future use on day 3 or day 5/6.

**eFigure 2.** Live Birth Rates by Year: Embryo Transfer Cycles Using Freshly Retrieved Donor Oocytes

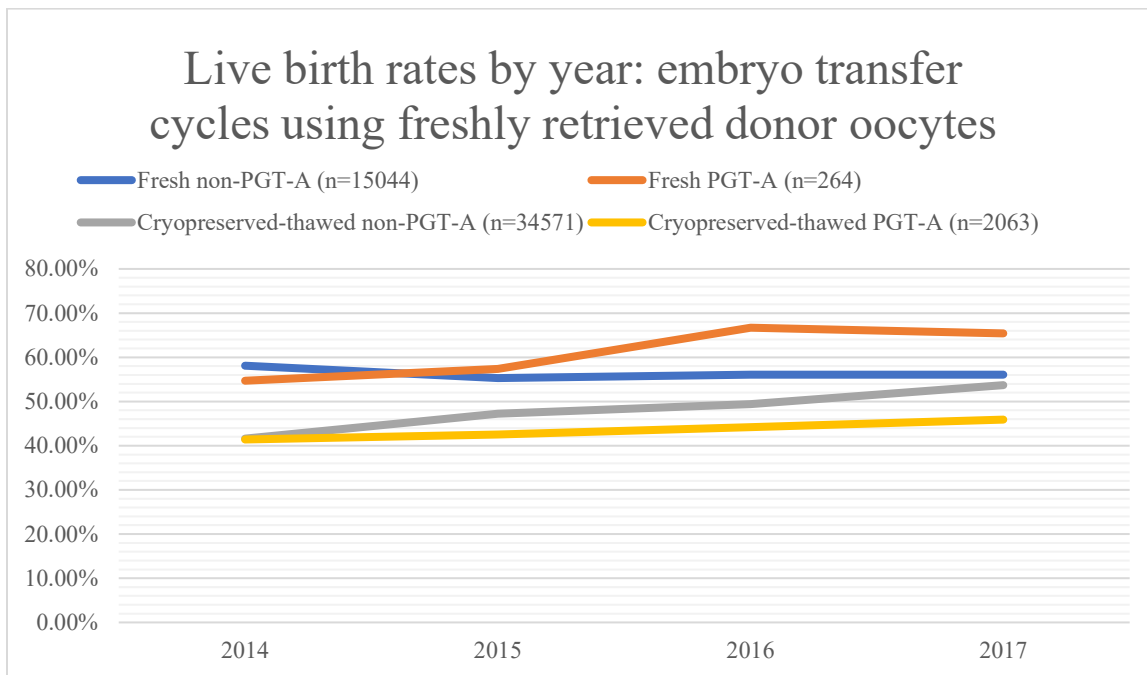

|                                | 2014       |       | 2015       |       | 2016       |       | 2017       |       |
|--------------------------------|------------|-------|------------|-------|------------|-------|------------|-------|
|                                | Live birth | Total |
| Fresh non-PGT-A                | 2997       | 5162  | 2410       | 4358  | 1830       | 3264  | 1268       | 2260  |
| Fresh PGT-A                    | 47         | 86    | 31         | 54    | 48         | 72    | 34         | 52    |
| Cryopreserved-thawed non-PGT-A | 2968       | 7168  | 3534       | 8322  | 4137       | 9369  | 4456       | 9712  |
| Cryopreserved-thawed PGT-A     | 89         | 214   | 152        | 322   | 341        | 691   | 449        | 836   |
